# Supplementary material
Source: bioRxiv or medRxiv preprint supplement (https://medrxiv.org/highwire/filestream/89058/field_highwire_adjunct_files/0/2020.07.10.20150540-1.pdf)
Supplement: Supplementary file [file 2020.07.10.20150540-1.pdf]

## Supplementary Figure 1:

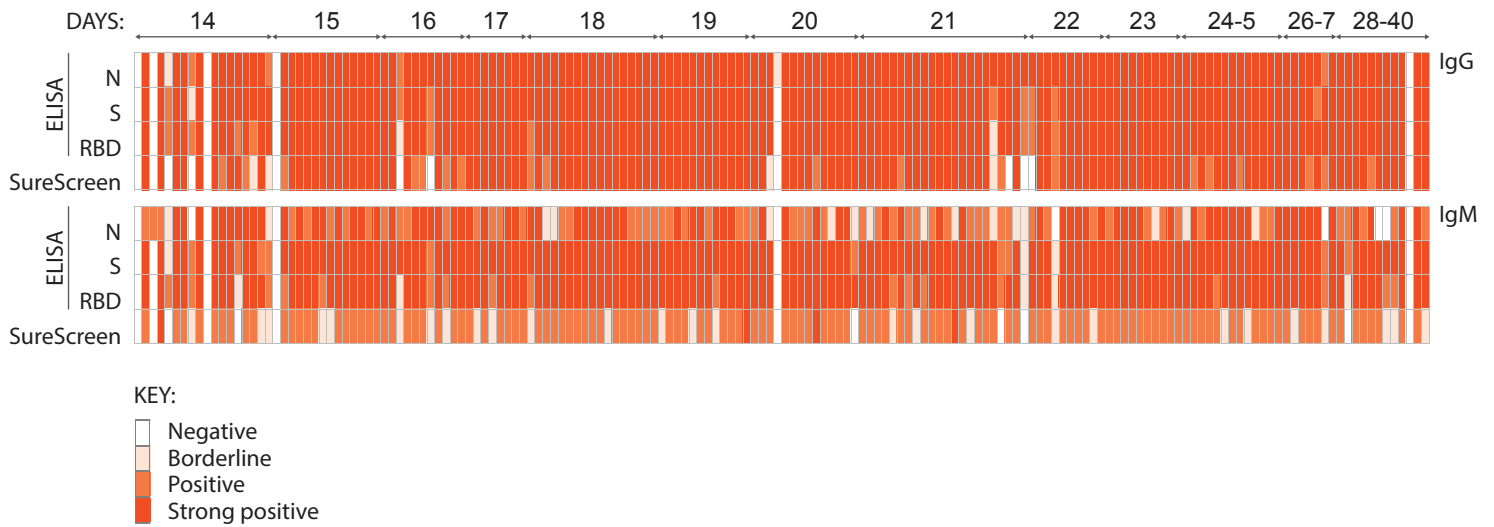

### Comparative assessment of 168 serum samples from SARS-CoV-2-infected individuals by ELISA and lateral flow immunoassay:

168 serum samples from individuals with confirmed SARS-CoV-2 infection were tested for the presence of antibody by ELISA to the full spike (S), receptor binding domain (RBD) and nucleocapsid (N), and by Surescreen lateral flow immunoassay. Detection of IgG is shown in the top panel, and IgM in the bottom panel. Samples are arranged according to days post onset of symptoms, ranging from 14 to 40 days. Results are displayed as a heatmap, with white indicating a negative result, and gradations of orange indicating the magnitude of response detected.
